# Supplementary material
Source: PubMed Central journal article supplement (PMC3747834)

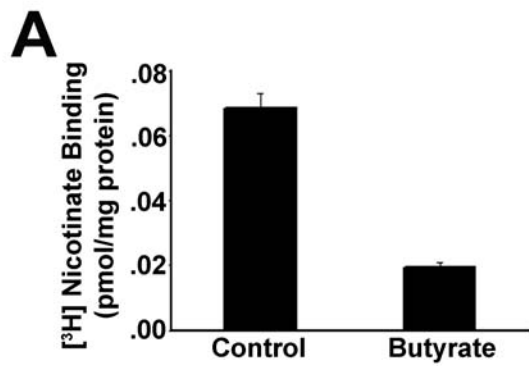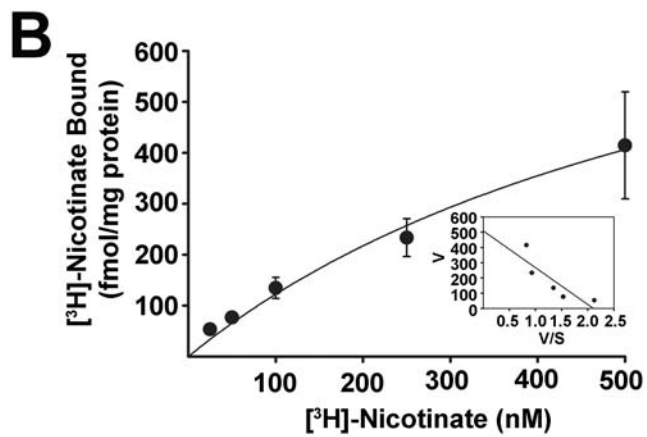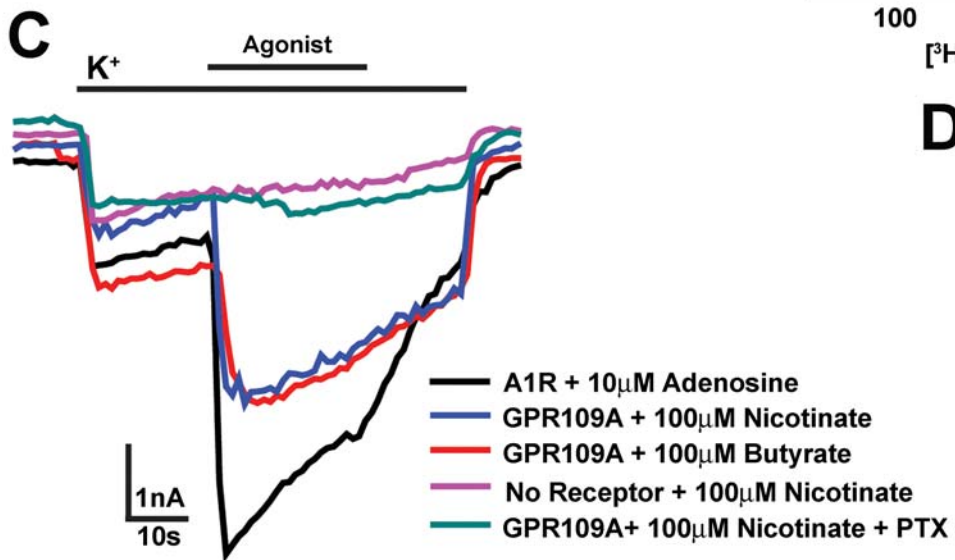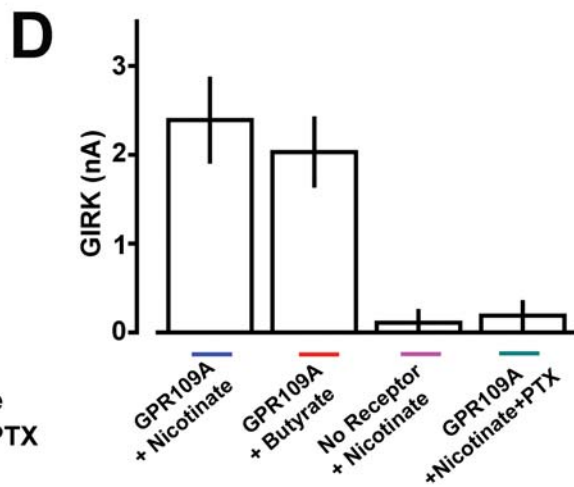

**S1**

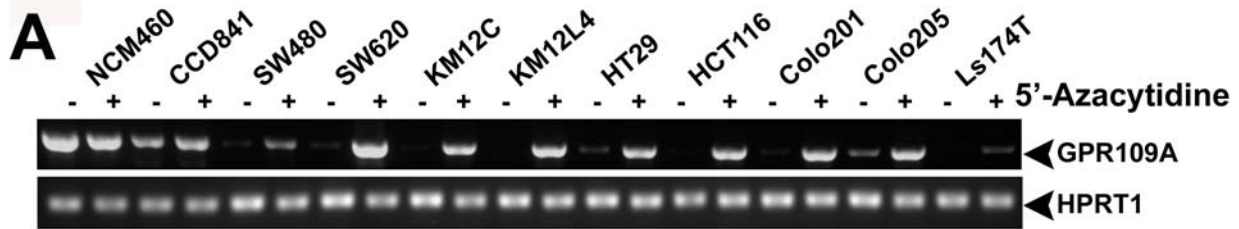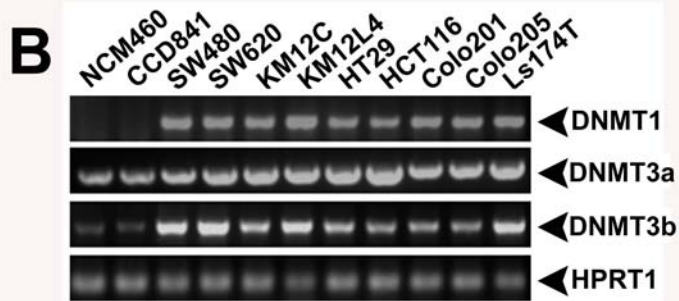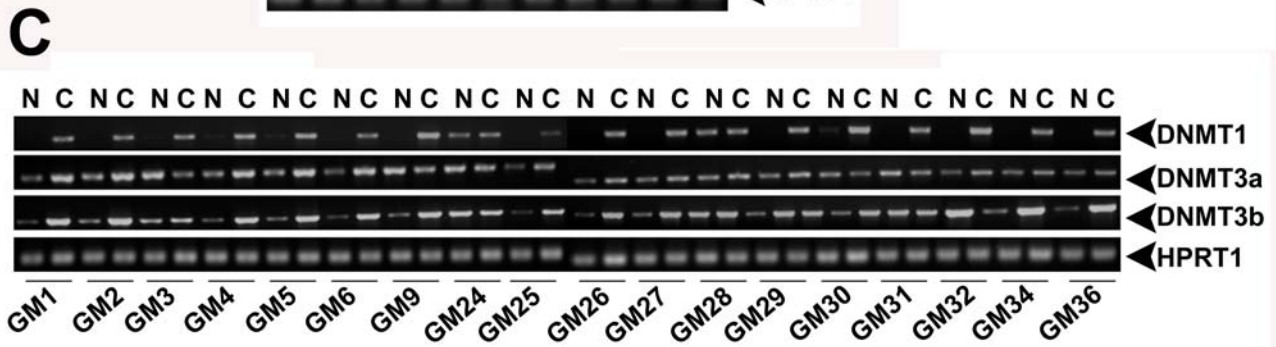

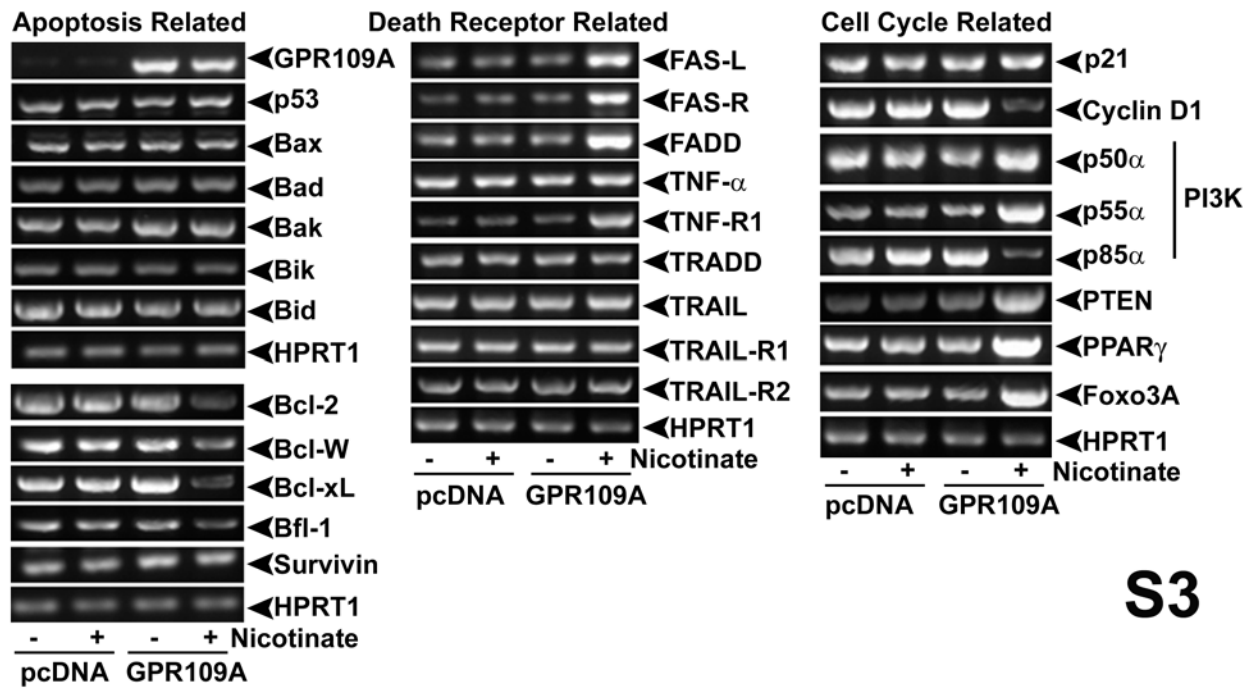

**S3**

**A**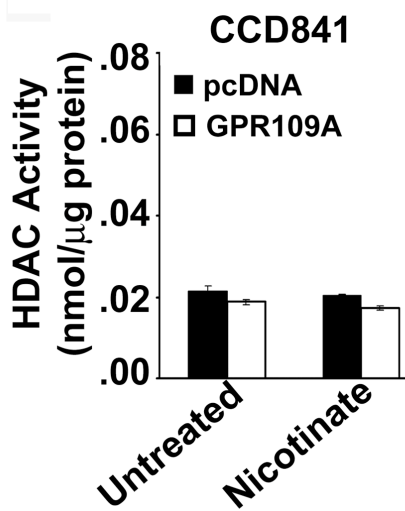**B**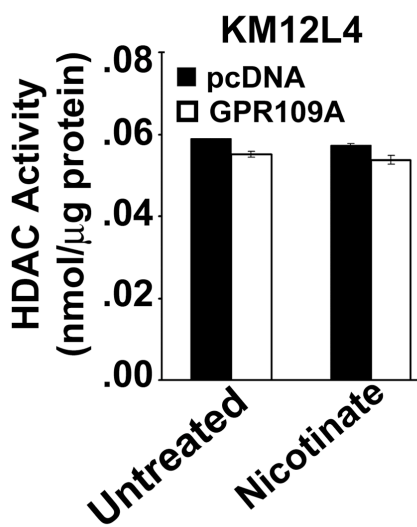**C**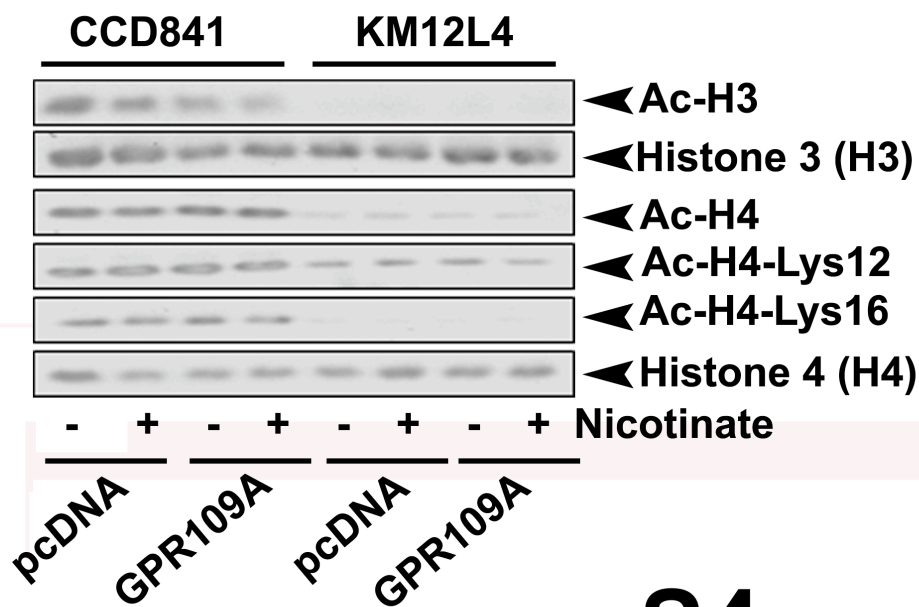**S4**

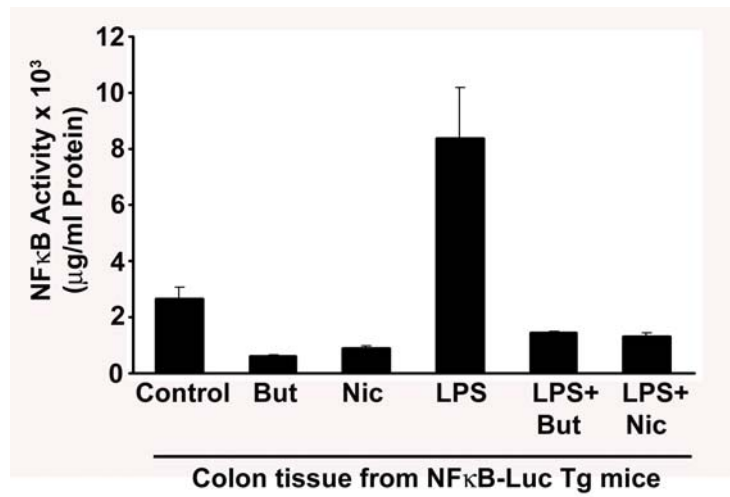

**S5**

Supplement: NIHMS486206-supplement-1.pdf [file NIHMS486206-supplement-1.pdf]
